# Supplementary material
Source: Springer Nature journal article supplement (https://www.springermedizin.de/resource/supplementary/12889_2013_5856_MOESM2_ESM.pdf/9496230)

**a) men in Denmark**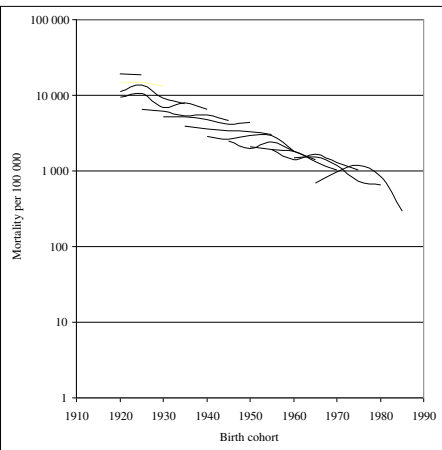**b) men in Finland**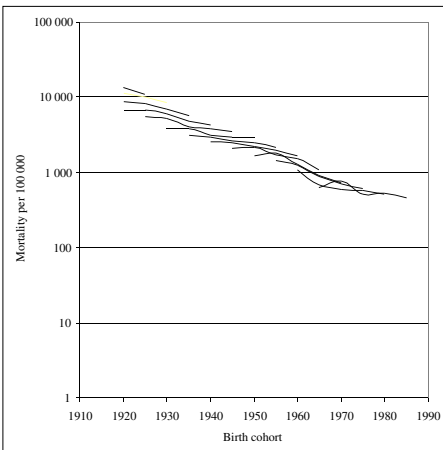**c) women in Denmark**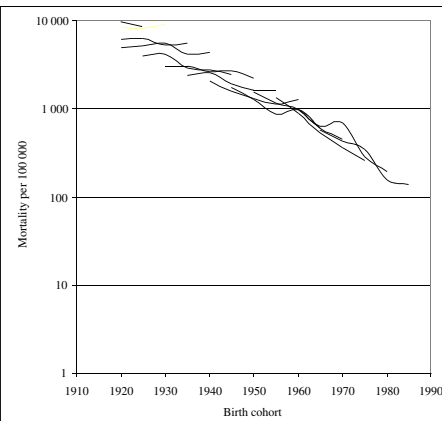**d) women in Finland**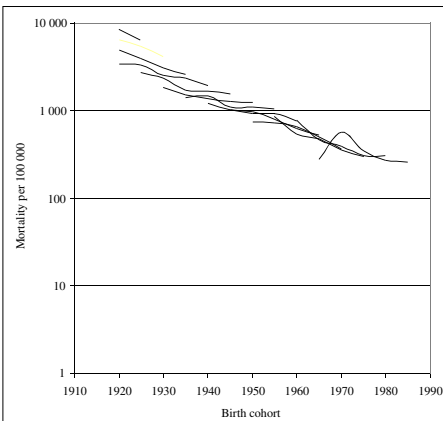

Supplement: MOESM2 [file 9496230]
